# Supplementary material
Source: PubMed Central journal article supplement (PMC6040191)
Supplement: JB.00740-17_zjb999094745s1.pdf [file JB.00740-17_zjb999094745s1.pdf]

# 1 Supplementary information

A)

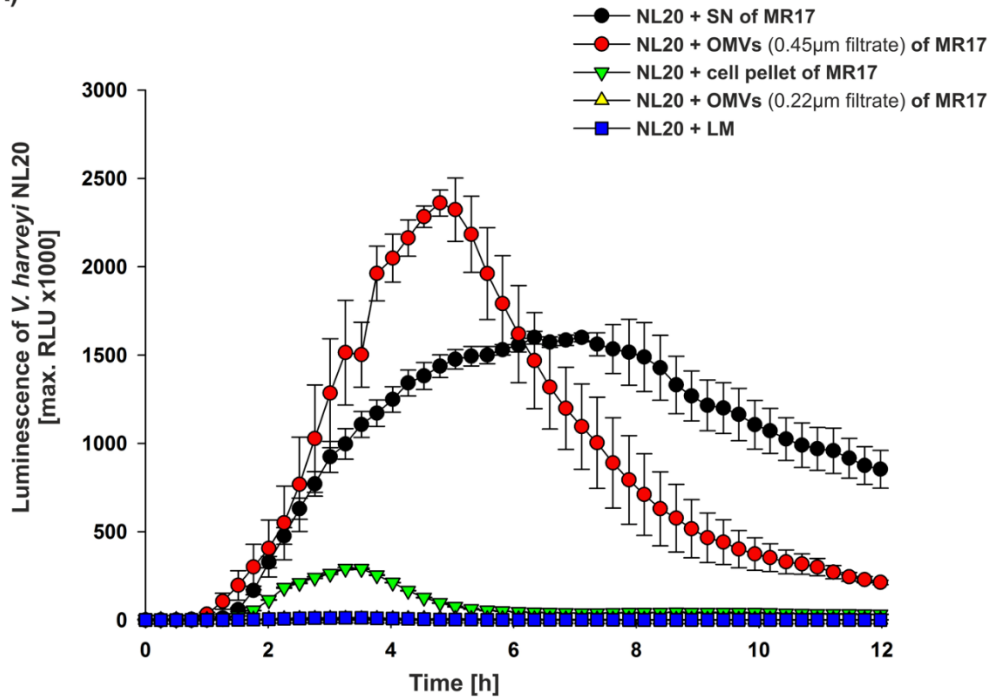

B)

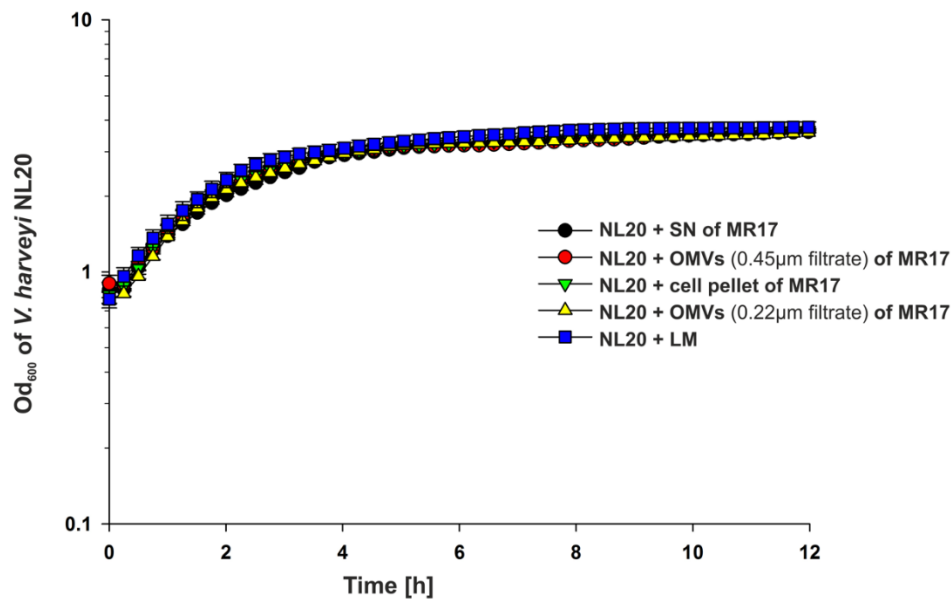

2

3 **Fig. S1: Time courses of growth and luminescence of the *V. harveyi* reporter strain NL20.**

4 The indicated fractions of the strain MR17 were added to the reporter strain NL20 and  
5 luminescence production (A) and growth (B) were monitored over time. MR17 synthesizes  
6 only CAI-1 and NL20 recognizes only CAI-1. Error bars represent the standard deviations of  
7 data from three different experiments. RLU, relative light units expressed in counts per second  
8 per milliliter per OD<sub>600</sub>. SN, culture supernatant; OMVs (0.45 µm filtrate), filtrate of SN  
9 through 0.45 µm filter; OMVs (0.22 µm filtrate), filtrate of SN additionally through 0.22 µm  
10 filter; LM, cell free culture medium as control.

11

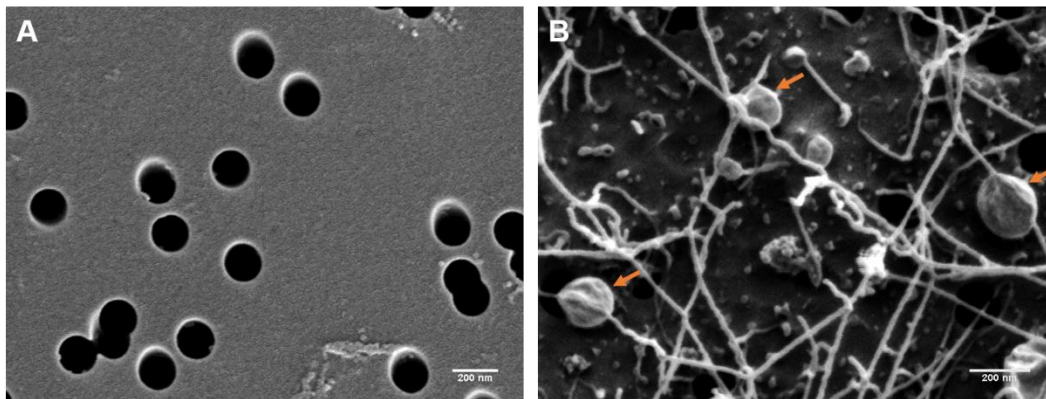

12

13

14 **Fig. S2: Large OMVs are retained on the surface of a 0.22- $\mu\text{m}$  PVDF filter after filtration.**

15 (A) Surface of an unused 0.22  $\mu\text{m}$  filter with uniform pores. (B) Scanning electron micrograph

16 of a 0.22  $\mu\text{m}$  PVDF filter membrane after filtration of the OMV-containing 0.45  $\mu\text{m}$  filtrate.

17 Different sizes of OMVs and flagella are trapped on the membrane. Scale bar = 200 nm.

18

19

20

21

22

23

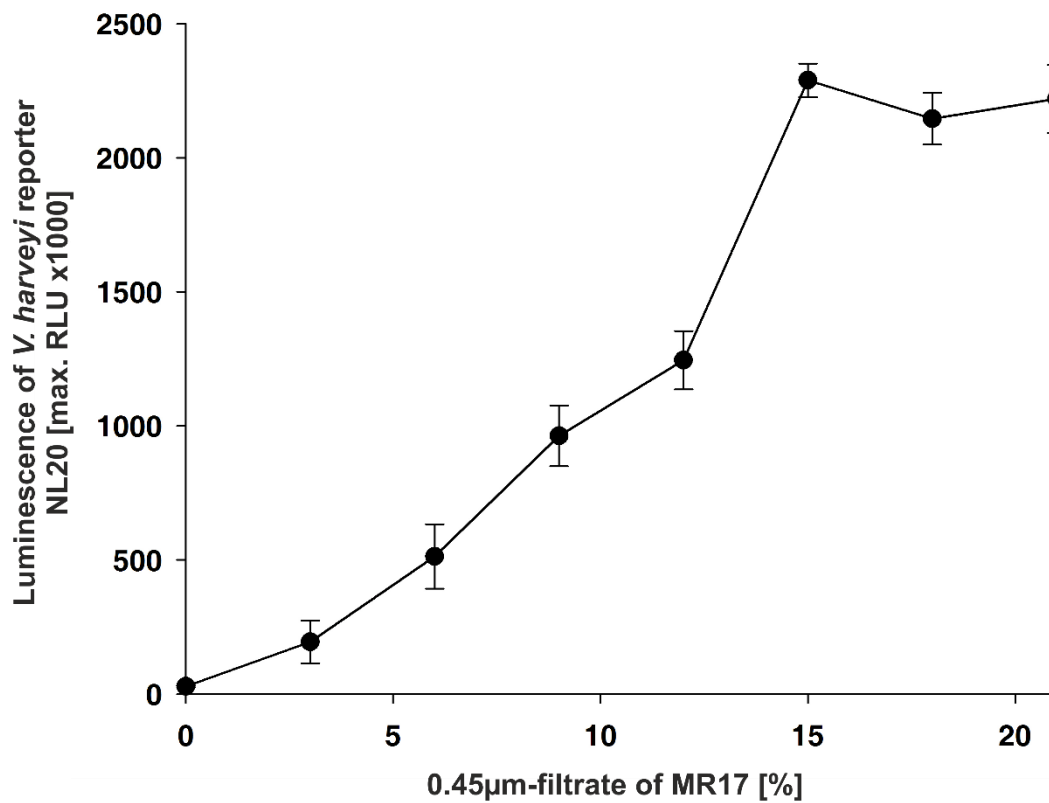

24  
 25  
 26  
 27  
 28  
 29  
 30  
 31  
 32  
 33  
 34  
 35

**Fig. S3: Relative quantification of CAI-1 in OMVs using *V. harveyi* reporter strain NL20.**  
 The indicated volume fractions of the OMV-containing 0.45 μm filtrate of strain MR17 were added to the reporter strain NL20 and luminescence production was monitored over time as readout for QS activation. MR17 synthesizes only CAI-1 and reporter strain NL20 recognizes only CAI-1. Error bars represent the standard deviations of data from three different experiments. RLU, relative light units expressed in counts per second per milliliter per OD<sub>600</sub>. OMVs (0.45 μm filtrate), filtrate of MR17 SN through 0.45 μm filter. %, percentage of 0.45 μm filtrate of strain MR17 added to reporter strain.

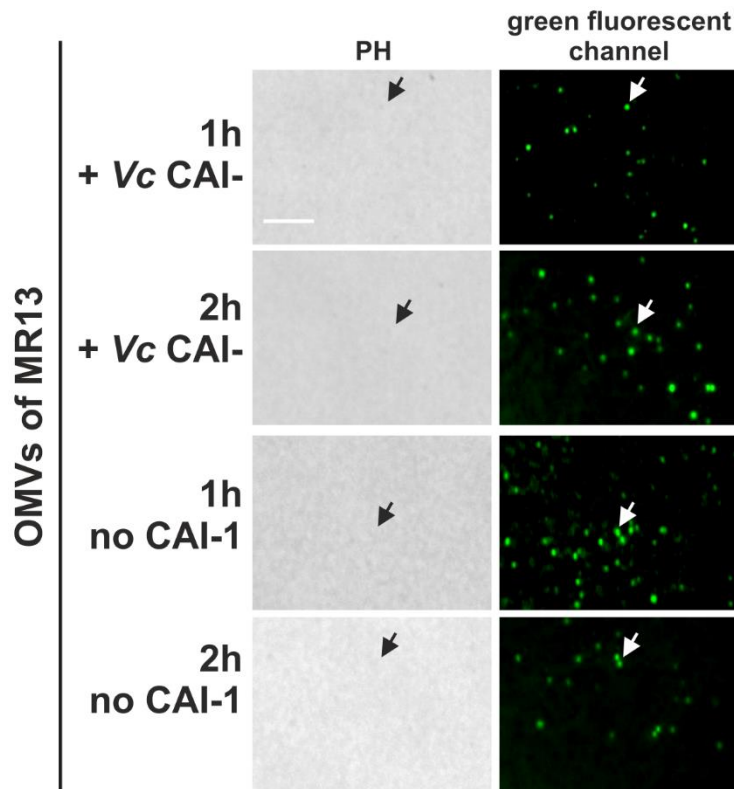

36  
37

38 **Fig. S4: OMV production is not stimulated by the presence of exogenous CAI-1.** Images  
 39 of fluorescently labelled OMVs. *V. harveyi* strain MR13 does not produce CAI-1, but is able to  
 40 release OMVs after 24 h of cultivation. Addition of 10  $\mu$ M *Cholerae* CAI-1 [(S)-3-hydroxy-  
 41 tridecan-4-one] (= *Vc* CAI-1) for up to 2 h did not stimulate OMV formation. Isolated OMVs  
 42 were stained with the green fluorescent MitoTrackerFM dye, which stains lipids, and imaged  
 43 using a green fluorescent channel. Each white arrow indicates a fluorescent OMV and the black  
 44 arrow shows the respective position in the phase-contrast image. PH, phase-contrast images;  
 45 green fluorescence images of stained OMVs. Scale bar = 5  $\mu$ m.
